# Supplementary material for: Syntheses and structures of mono-, di- and tetranuclear rhodium or iridium complexes of thiacalix[4]arene derivatives
Source: Royal Society of Chemistry journal article supplement (doi:10.1039/b502999f), 2005-01-01
Supplement: b502999f.pdf [file b502999f.pdf]

## Syntheses and Structures of Mono-, Di- and Tetranuclear Rhodium or Iridium Complexes of Thiocalix[4]arene Derivatives†

Kenji Hirata, Toshiaki Suzuki,<sup>‡</sup> Ai Noya, Izuru Takei and Masanobu Hidai\*

**General procedure.** All manipulations were performed under a nitrogen atmosphere using standard Schlenk techniques. TC4A(OH)<sub>4</sub> (**1**)<sup>1</sup>, TC4A(SH)<sub>4</sub> (**2**)<sup>2</sup>, [Cp\*IrCl<sub>2</sub>]<sub>2</sub><sup>3</sup> and [Cp\*RhCl<sub>2</sub>]<sub>2</sub><sup>3</sup> were synthesized as described in the literature. Acetone, THF, CH<sub>2</sub>Cl<sub>2</sub> and hexane were distilled under nitrogen over appropriate drying reagents (CaSO<sub>4</sub>, sodium benzophenone ketyl or P<sub>2</sub>O<sub>5</sub>). Potassium carbonate, methyl iodide, *N,N*-dimethylthiocarbamoyl chloride, lithium aluminum hydride and boron tribromide (1 M solution in CH<sub>2</sub>Cl<sub>2</sub>) were obtained commercially and used without further purification. NMR spectra were recorded on a JEOL EX-400 spectrometer. IR spectra were recorded using a Shimadzu FTIR-8300 spectrometer. Elemental analyses were performed on a Perkin-Elmer 2400 series II CHNS analyzer.

**Synthesis of TC4A(OMe)<sub>2</sub>(OH)<sub>2</sub> (**4**).**<sup>4</sup> To a suspension of TC4A(OH)<sub>4</sub> (**1**) (6.00 g, 8.32 mmol) and K<sub>2</sub>CO<sub>3</sub> (1.15 g, 8.32 mmol) in acetone (50 mL) was added methyl iodide (5.2 mL, 84 mmol), and the mixture was stirred at reflux for 42 h. After addition of dilute hydrochloric acid, the resulting mixture was extracted with chloroform. The solvent was evaporated, and the residue was washed with acetone to give a white solid of **4**. Yield, 89%. <sup>1</sup>H NMR (400 MHz, CDCl<sub>3</sub>)  $\delta$  7.74 (s, 2H, OH), 7.61 (s, 4H, C<sub>6</sub>H<sub>2</sub>), 7.16 (s, 4H, C<sub>6</sub>H<sub>2</sub>), 4.01 (s, 6H, CH<sub>3</sub>), 1.32 (s, 18H, Bu<sup>t</sup>), 0.95 (s, 18H, Bu<sup>t</sup>).

**Synthesis of TC4A(OMe)<sub>2</sub>(OC(=S)NMe<sub>2</sub>)<sub>2</sub> (**5**).** A suspension of **4** (5.54 g, 7.40 mmol), K<sub>2</sub>CO<sub>3</sub> (10.2 g, 74.0 mmol) and *N,N*-dimethylthiocarbamoyl chloride (9.14 g, 74.0 mmol) in acetone (100 mL) was stirred at reflux for 42 h. After the solvent was evaporated, the residue was extracted with CHCl<sub>3</sub>. The solvent was evaporated, and the residue was washed with acetone to give a white solid of **5**. This product was used directly for the next step without further purification. Yield, 83%. <sup>1</sup>H NMR (400 MHz, CDCl<sub>3</sub>)  $\delta$  7.7–7.2 (m, 8H, C<sub>6</sub>H<sub>2</sub>), 3.41 (s, 12H, NCH<sub>3</sub>), 3.23 (s, 6H, OCH<sub>3</sub>), 1.4–1.2 (m, 36H, Bu<sup>t</sup>). IR spectrum (KBr): 1533 cm<sup>-1</sup>.

**Synthesis of TC4A(OMe)<sub>2</sub>(SC(=O)NMe<sub>2</sub>)<sub>2</sub> (**6**).** Compound **5** (5.64 g, 6.11 mmol) was heated in vacuo at 260 °C until the IR frequency of compound **5** disappeared. The resulting solid was washed with acetone to give a white solid of **6**. This product was used directly for the next step without further purification. Yield, 96%. <sup>1</sup>H NMR (400 MHz, CDCl<sub>3</sub>)  $\delta$  7.6–7.4 (m, 8H, C<sub>6</sub>H<sub>2</sub>), 3.20 (s, 6H, OCH<sub>3</sub>), 2.98 (s, 12H, NCH<sub>3</sub>), 1.4–1.1 (m, 36H, Bu<sup>t</sup>). IR spectrum (KBr): 1674 cm<sup>-1</sup>.

**Synthesis of TC4A(OMe)<sub>2</sub>(SH)<sub>2</sub> (7).** To a solution of **6** (5.40 g, 5.85 mmol) in THF (20 mL) was added lithium aluminum hydride (1.11 g, 29.2 mmol) in portions at room temperature, and the reaction mixture was stirred for 9 h. Excess lithium aluminum hydride was quenched by careful addition of H<sub>2</sub>O at 0 °C. After THF was evaporated, the solution was neutralized by addition of dilute hydrochloric acid and extracted with chloroform. The solvent was evaporated, and the residue was washed with acetone to give a white solid of **7**. Yield, 45%. <sup>1</sup>H NMR (400 MHz, CDCl<sub>3</sub>) δ 7.66 (s, 4H, C<sub>6</sub>H<sub>2</sub>), 7.43 (s, 4H, C<sub>6</sub>H<sub>2</sub>), 4.99 (br, 2H, SH), 3.77 (s, 6H, OCH<sub>3</sub>), 1.28 (s, 18H, Bu<sup>t</sup>), 1.18 (s, 18H, Bu<sup>t</sup>). IR spectrum (KBr): 2529 cm<sup>-1</sup>.

**Synthesis of TC4A(OH)<sub>2</sub>(SH)<sub>2</sub> (3).** To a suspension of **7** (2.07 g, 2.65 mmol) in CH<sub>2</sub>Cl<sub>2</sub> (40 mL) was added 1 M BBr<sub>3</sub> solution in CH<sub>2</sub>Cl<sub>2</sub> (6.6 mL). After stirring for 1 h, the reaction mixture was poured into 300 mL of H<sub>2</sub>O. The mixture was extracted with Et<sub>2</sub>O and the organic phase was dried over Na<sub>2</sub>SO<sub>4</sub>. After the solvent was evaporated, the residue was washed with MeOH to give a white solid of **3**. Yield, 89%. Anal. Calcd for C<sub>40</sub>H<sub>48</sub>O<sub>2</sub>S<sub>6</sub>: C, 63.78; H, 6.42; S, 25.54. Found: C, 63.08; H, 6.58; S, 25.54. <sup>1</sup>H NMR (400 MHz, CDCl<sub>3</sub>) δ 7.66 (s, 4H, C<sub>6</sub>H<sub>2</sub>), 7.18 (s, 2H, OH), 7.14 (s, 4H, C<sub>6</sub>H<sub>2</sub>), 6.40 (s, 2H, SH), 1.33 (s, 18H, Bu<sup>t</sup>), 0.88 (s, 18H, Bu<sup>t</sup>). IR spectrum (KBr): 3213, 2509 cm<sup>-1</sup>.

**Synthesis of (Cp\**Rh*)<sub>2</sub>{η<sup>3</sup>-TC4A(OH)<sub>2</sub>(O)<sub>2</sub>} (8a).** A suspension of [Cp\**Rh*Cl<sub>2</sub>]<sub>2</sub> (30.9 mg, 0.050 mmol), **1** (72.1 mg, 0.10 mmol) and K<sub>2</sub>CO<sub>3</sub> (28 mg, 0.20 mmol) in THF (4.0 mL) was stirred overnight at room temperature. The reaction mixture was filtered and the filtrate was dried up in vacuo. Recrystallization from CH<sub>2</sub>Cl<sub>2</sub>-hexane gave complex **8a**·2CH<sub>2</sub>Cl<sub>2</sub> as red crystals. Yield, 98%. Anal. Calcd for C<sub>50</sub>H<sub>61</sub>O<sub>4</sub>RhS<sub>4</sub>·2CH<sub>2</sub>Cl<sub>2</sub>: C, 55.41; H, 5.81; S, 11.38. Found: C, 55.74; H, 5.65; S, 11.77. <sup>1</sup>H NMR (CDCl<sub>3</sub>): δ 10.98 (s, 2H, OH), 7.67 (d, 2H, C<sub>6</sub>H<sub>2</sub>, *J* = 2.4 Hz), 7.51 (d, 2H, C<sub>6</sub>H<sub>2</sub>, *J* = 2.4 Hz), 7.45 (d, 2H, C<sub>6</sub>H<sub>2</sub>, *J* = 2.4 Hz), 7.36 (d, 2H, C<sub>6</sub>H<sub>2</sub>, *J* = 2.4 Hz), 1.98 (s, 15H, Cp\*), 1.20 (s, 18H, *t*-Bu), 1.17 (s, 18H, *t*-Bu).

**Synthesis of (Cp\**Ir*)<sub>2</sub>{η<sup>3</sup>-TC4A(OH)<sub>2</sub>(O)<sub>2</sub>} (8b).** A suspension of [Cp\**Ir*Cl<sub>2</sub>]<sub>2</sub> (39.8 mg, 0.050 mmol), **1** (72.1 mg, 0.10 mmol) and K<sub>2</sub>CO<sub>3</sub> (28 mg, 0.20 mmol) in THF (4.0 mL) was stirred overnight at room temperature. The reaction mixture was filtered and the filtrate was dried up in vacuo. Recrystallization from CH<sub>2</sub>Cl<sub>2</sub>-hexane gave complex **8b**·2CH<sub>2</sub>Cl<sub>2</sub> as orange crystals. Yield, 97%. Anal. Calcd for C<sub>50</sub>H<sub>61</sub>IrO<sub>4</sub>S<sub>4</sub>·2CH<sub>2</sub>Cl<sub>2</sub>: C, 51.34; H, 5.39; S, 10.54. Found: C, 51.65; H, 5.52; S, 10.68. <sup>1</sup>H NMR (CDCl<sub>3</sub>): δ 10.57 (s, 2H, OH), 7.68 (br, 2H, C<sub>6</sub>H<sub>2</sub>), 7.46 (d, 2H, C<sub>6</sub>H<sub>2</sub>, *J* = 2.4 Hz), 7.45 (d, 2H, C<sub>6</sub>H<sub>2</sub>, *J* = 2.4 Hz), 7.42 (d, 2H, C<sub>6</sub>H<sub>2</sub>, *J* = 2.4 Hz), 1.99 (s, 15H, Cp\*), 1.21 (s, 18H, *t*-Bu), 1.17 (s, 18H, *t*-Bu).

**Synthesis of (Cp\**Rh*)<sub>2</sub>{η<sup>3</sup>:η<sup>3</sup>-TC4A(S)<sub>4</sub>} (9a).** A solution of [Cp\**Rh*Cl<sub>2</sub>]<sub>2</sub> (30.9 mg, 0.050 mmol) and **2** (78.5 mg, 0.10 mmol) in THF (4.0 mL) was stirred overnight at room temperature. After the reaction mixture was dried up

in vacuo, the residue was recrystallized from THF-hexane to give complex **9a**·2THF as red crystals. Otherwise, recrystallization from CH<sub>2</sub>Cl<sub>2</sub>-hexane to give complex **9a** as red crystals. Yield, 61%. Anal. Calcd for C<sub>60</sub>H<sub>74</sub>Rh<sub>2</sub>S<sub>8</sub>·2C<sub>4</sub>H<sub>8</sub>O: C, 58.26; H, 6.47, S: 18.30. Found: C, 57.78; H, 6.78, S: 18.44. <sup>1</sup>H NMR (CDCl<sub>3</sub>): δ 7.20 (d, 4H, C<sub>6</sub>H<sub>2</sub>, *J* = 2.0 Hz), 6.94 (d, 4H, C<sub>6</sub>H<sub>2</sub>, *J* = 2.0 Hz), 1.82 (s, 30H, Cp\*), 1.05 (s, 36H, *t*-Bu).

**Synthesis of (Cp\*Ir)<sub>2</sub>{η<sup>3</sup>:η<sup>3</sup>-TC4A(S)<sub>4</sub>} (9b).** A solution of [Cp\*IrCl<sub>2</sub>]<sub>2</sub> (39.8 mg, 0.10 mmol) and **2** (78.5 mg, 0.10 mmol) in THF (4.0 mL) was stirred overnight at room temperature. After the reaction mixture was dried up in vacuo, the residue was recrystallized from THF-hexane to give complex **9b**·2THF as orange crystals. Yield, 68%. Otherwise, recrystallization from CH<sub>2</sub>Cl<sub>2</sub>-hexane to give complex **9b** as orange crystals. Anal. Calcd for C<sub>60</sub>H<sub>74</sub>Ir<sub>2</sub>S<sub>8</sub>·2C<sub>4</sub>H<sub>8</sub>O: C, 51.68; H, 5.74; S, 16.23. Found: C, 51.19; H, 5.97; S, 16.35. <sup>1</sup>H NMR (CDCl<sub>3</sub>): δ 7.17 (d, 4H, C<sub>6</sub>H<sub>2</sub>, *J* = 2.0 Hz), 7.01 (d, 4H, C<sub>6</sub>H<sub>2</sub>, *J* = 2.0 Hz), 1.91 (s, 30H, Cp\*), 1.07 (s, 36H, *t*-Bu).

**Synthesis of (Cp\*Rh)<sub>2</sub>(Cp\*RhCl)<sub>2</sub>{η<sup>3</sup>:η<sup>3</sup>:η<sup>1</sup>:η<sup>1</sup>-TC4A(O)<sub>2</sub>(S)<sub>2</sub>} (10a).** To a solution of [Cp\*RhCl<sub>2</sub>]<sub>2</sub> (61.5 mg, 0.0996 mmol) and **3** (37.5 mg, 0.0498 mmol) in THF (5.0 mL) was added 4 equiv of NEt<sub>3</sub> (28 μL, 0.20 mmol), and the mixture was stirred overnight at room temperature. The reaction mixture was filtered, and the filtrate was dried up in vacuo. Recrystallization from CH<sub>2</sub>Cl<sub>2</sub>-hexane gave red crystals of **10a**·4CH<sub>2</sub>Cl<sub>2</sub>. Yield, 70%. As confirmed by the X-ray analysis, the crystals of **10a**·4CH<sub>2</sub>Cl<sub>2</sub> obtained here contain four solvating CH<sub>2</sub>Cl<sub>2</sub> molecules. However, the crystals lose three of the solvating CH<sub>2</sub>Cl<sub>2</sub> molecules when they are thoroughly dried in vacuo. This has been confirmed by the <sup>1</sup>H NMR of the dried sample of **10a**·4CH<sub>2</sub>Cl<sub>2</sub>, and therefore the calculated values in elemental analysis are based on the formula with one solvating CH<sub>2</sub>Cl<sub>2</sub>. Anal. Calcd for C<sub>80</sub>H<sub>104</sub>Cl<sub>4</sub>O<sub>2</sub>Rh<sub>4</sub>S<sub>6</sub>·CH<sub>2</sub>Cl<sub>2</sub>: C, 50.45; H, 5.54; S, 9.98. Found: C, 50.05; H, 5.69; S, 10.26. <sup>1</sup>H NMR (400 MHz, CD<sub>2</sub>Cl<sub>2</sub>, 298 K): δ 7.6–7.4 (br, 2H, C<sub>6</sub>H<sub>2</sub>), 7.35–7.25 (br, 2H), 7.25 (d, 2H, C<sub>6</sub>H<sub>2</sub>, *J* = 2.2 Hz), 7.00 (d, 2H, C<sub>6</sub>H<sub>2</sub>, *J* = 2.2 Hz), 1.86 (s, 30H, Cp\*), 1.55 (s, 30H, Cp\*), 1.21 (s, 18H, Bu<sup>t</sup>), 1.08 (s, 18H, Bu<sup>t</sup>). <sup>1</sup>H NMR (400 MHz, CD<sub>2</sub>Cl<sub>2</sub>, 273 K): δ 7.48 (s, 2H, C<sub>6</sub>H<sub>2</sub>), 7.25 (br, 4H, C<sub>6</sub>H<sub>2</sub>), 7.00 (d, 2H, C<sub>6</sub>H<sub>2</sub>, *J* = 2.2 Hz), 1.86 (s, 30H, Cp\*), 1.55 (s, 30H, Cp\*), 1.21 (s, 18H, Bu<sup>t</sup>), 1.08 (s, 18H, Bu<sup>t</sup>).

**Synthesis of (Cp\*Ir)<sub>2</sub>(Cp\*IrCl)<sub>2</sub>{η<sup>3</sup>:η<sup>3</sup>:η<sup>1</sup>:η<sup>1</sup>-TC4A(O)<sub>2</sub>(S)<sub>2</sub>} (10b).** To a solution of [Cp\*IrCl<sub>2</sub>]<sub>2</sub> (76.2 mg, 0.956 mmol) and **3** (36.0 mg, 0.0478 mmol) in THF (5.0 mL) was added 4 equiv of NEt<sub>3</sub> (27 μL, 0.19 mmol), and the mixture was stirred overnight at room temperature. The reaction mixture was filtered, and the filtrate was dried up in vacuo. Recrystallization from CH<sub>2</sub>Cl<sub>2</sub>-hexane gave orange crystals of **10b**·4CH<sub>2</sub>Cl<sub>2</sub>. Yield, 63%. As confirmed by the X-ray analysis, the crystals of **10b**·4CH<sub>2</sub>Cl<sub>2</sub> obtained here contain four solvating CH<sub>2</sub>Cl<sub>2</sub> molecules. However, the crystals lose three of the solvating CH<sub>2</sub>Cl<sub>2</sub> molecules when they are thoroughly dried in vacuo. This has been confirmed by the <sup>1</sup>H NMR of the dried sample of **10b**·4CH<sub>2</sub>Cl<sub>2</sub>, and therefore the calculated values in elemental analysis are based on the formula with one solvating CH<sub>2</sub>Cl<sub>2</sub>. Anal. Calcd for

$C_{80}H_{104}Cl_4Ir_4O_2S_6 \cdot CH_2Cl_2$ : C, 42.56; H, 4.67; S, 8.42. Found: C, 42.75; H, 4.79; S, 8.61.  $^1H$  NMR (400 MHz,  $CD_2Cl_2$ , 298 K):  $\delta$  8.7–8.45 (br, 2H,  $C_6H_2$ ), 8.20–7.9 (br, 2H,  $C_6H_2$ ), 7.34 (d, 2H,  $C_6H_2$ ,  $J = 2.2$  Hz), 7.02 (d, 2H,  $C_6H_2$ ,  $J = 2.2$  Hz), 1.92 (s, 30H, Cp\*), 1.54 (s, 30H, Cp\*), 1.23 (s, 18H, Bu<sup>t</sup>), 1.10 (s, 18H, Bu<sup>t</sup>).  $^1H$  NMR (400 MHz,  $CD_2Cl_2$ , 273 K):  $\delta$  8.63 (br s, 2H,  $C_6H_2$ ), 8.10 (br s, 2H,  $C_6H_2$ ), 7.34 (d, 2H,  $C_6H_2$ ,  $J = 2.2$  Hz), 7.02 (d, 2H,  $C_6H_2$ ,  $J = 2.2$  Hz), 1.92 (s, 30H, Cp\*), 1.54 (s, 30H, Cp\*), 1.23 (s, 18H, Bu<sup>t</sup>), 1.10 (s, 18H, Bu<sup>t</sup>).

**Synthesis of  $(Cp^*RhCl)_2\{\eta^2\text{-TC4A(OH)}_2(S)_2\}$  (**11a**).** A solution of  $[Cp^*RhCl_2]_2$  (28.8 mg, 0.0466 mmol) and **3** (35.1 mg, 0.0466 mmol) in THF (5.0 mL) was stirred overnight at room temperature. The solution was dried up in vacuo to give a red solid. Recrystallization from  $CH_2Cl_2$ –hexane afforded red crystals of **11a**· $CH_2Cl_2$ . Yield, 77%. Anal. Calcd for  $C_{60}H_{76}Cl_2O_2Rh_2S_6 \cdot CH_2Cl_2$ : C, 52.96; H, 5.68; S, 13.91. Found: C, 52.59; H, 6.02; S, 13.80.  $^1H$  NMR (400 MHz,  $C_4D_8O$ )  $\delta$  7.85 (d, 2H,  $C_6H_2$ ,  $J = 2.4$  Hz), 7.74 (d, 2H,  $C_6H_2$ ,  $J = 2.4$  Hz), 7.33 (s, 2H, OH), 6.94 (d, 2H,  $C_6H_2$ ,  $J = 2.0$  Hz), 6.89 (d, 2H,  $C_6H_2$ ,  $J = 2.0$  Hz), 1.60 (s, 30H, Cp\*), 1.40 (s, 18H, Bu<sup>t</sup>), 0.87 (s, 18H, Bu<sup>t</sup>).

**Synthesis of  $[(Cp^*IrCl)_2\{\eta^2\text{-TC4A(OH)}_2(S)_2\}]$  (**11b**).** A solution of  $[Cp^*IrCl_2]_2$  (36.9 mg, 0.0463 mmol) and **3** (34.9 mg, 0.0463 mmol) in THF (5.0 mL) was stirred overnight at room temperature. The solution was dried up in vacuo to give an orange solid. Recrystallization from  $CH_2Cl_2$ –hexane afforded orange crystals of **11b**· $CH_2Cl_2$ . Yield, 73%. Anal. Calcd for  $C_{60}H_{76}Cl_2Ir_2O_2S_6 \cdot CH_2Cl_2$ : C, 46.91; H, 5.03; S, 12.32. Found: C, 47.03; H, 5.21; S, 11.70.  $^1H$  NMR (400 MHz,  $CDCl_3$ ):  $\delta$  7.79 (d, 2H,  $C_6H_2$ ,  $J = 2.9$  Hz), 7.70 (d, 2H,  $C_6H_2$ ,  $J = 2.9$  Hz), 6.95 (d, 2H,  $C_6H_2$ ,  $J = 2.2$  Hz), 6.86 (d, 2H,  $C_6H_2$ ,  $J = 2.2$  Hz), 6.67 (s, 2H, OH), 1.65 (s, 30H, Cp\*), 1.37 (s, 18H, Bu<sup>t</sup>), 0.86 (s, 18H, Bu<sup>t</sup>).

**Synthesis of  $[(Cp^*Rh)_2\{\eta^3\text{-TC4A(O)}_2(S)_2\}]$  (**12a**).** To a solution of Complex **11a** (46.2 mg, 0.0334 mmol) in THF (5.0 mL) was added 2 equiv of  $NEt_3$  (9.3  $\mu$ L, 0.067 mmol) at room temperature and the mixture was stirred overnight. The reaction mixture was dried up in vacuo, and the residue was extracted with hexane. The solution was concentrated and cooled in refrigerator overnight to give red crystals of **12a**. Yield, 98%. Anal. Calcd for  $C_{60}H_{74}O_2Rh_2S_6$ : C, 58.81; H, 6.09; S, 15.70. Found: C, 59.16; H, 6.52; S, 15.06.  $^1H$  NMR (400 MHz,  $CDCl_3$ )  $\delta$  7.53 (d, 2H,  $C_6H_2$ ,  $J = 2.0$  Hz), 7.26 (d, 4H,  $C_6H_2$ ,  $J = 2.0$  Hz), 6.98 (d, 2H,  $C_6H_2$ ,  $J = 2.4$  Hz), 6.69 (d, 2H,  $C_6H_2$ ,  $J = 2.4$  Hz), 1.85 (s, 30H, Cp\*), 1.26 (s, 18H, Bu<sup>t</sup>), 0.88 (s, 18H, Bu<sup>t</sup>).

**Synthesis of  $[(Cp^*Ir)_2\{\eta^3\text{-TC4A(O)}_2(S)_2\}]$  (**12b**).** To a solution of Complex **11b** (48.9 mg, 0.0313 mmol) in THF (5.0 mL) was added 2 equiv of  $NEt_3$  (8.7  $\mu$ L, 0.063 mmol) at room temperature and the mixture was stirred overnight. The reaction mixture was dried up in vacuo, and the residue was extracted with hexane. The solution was concentrated and cooled in refrigerator overnight to give orange crystals of **12b**. Yield, 93%. Anal. Calcd for  $C_{60}H_{74}Ir_2O_2S_6$ : C, 51.33; H, 5.31; S, 13.70. Found: C, 51.54; H, 5.52; S, 13.14.  $^1H$  NMR (400 MHz,  $CDCl_3$ )  $\delta$  7.48 (d,

2H, C<sub>6</sub>H<sub>2</sub>, *J* = 2.0 Hz), 7.33 (d, 2H, C<sub>6</sub>H<sub>2</sub>, *J* = 2.0 Hz), 6.97 (d, 2H, C<sub>6</sub>H<sub>2</sub>, *J* = 2.2 Hz), 6.77 (d, 2H, C<sub>6</sub>H<sub>2</sub>, *J* = 2.2 Hz), 1.92 (s, 30H, Cp\*), 1.27 (s, 18H, Bu<sup>t</sup>), 0.91 (s, 18H, Bu<sup>t</sup>).

**Reaction of 12a and [Cp\*RhCl<sub>2</sub>]<sub>2</sub>.** A solution of **12a** (95.5 mg, 0.0799 mmol) and [Cp\*RhCl<sub>2</sub>]<sub>2</sub> (48.2 mg, 0.0799 mmol) in THF (5.0 mL) was stirred overnight. The solution was dried up in vacuo to give a red solid. Recrystallization from CH<sub>2</sub>Cl<sub>2</sub>–hexane afforded red crystals of **10a**·4CH<sub>2</sub>Cl<sub>2</sub>. Yield, 70%.

**Reaction of 12b and [Cp\*IrCl<sub>2</sub>]<sub>2</sub>.** A solution of **12b** (97.7 mg, 0.0696 mmol) and [Cp\*IrCl<sub>2</sub>]<sub>2</sub> (55.4 mg, 0.0696 mmol) in THF (5.0 mL) was stirred overnight. The solution was dried up in vacuo to give an orange solid. Recrystallization from CH<sub>2</sub>Cl<sub>2</sub>–hexane afforded orange crystals of **10b**·4CH<sub>2</sub>Cl<sub>2</sub>. Yield, 62%.

**X-ray Crystal Structure Determination of 8b, 9a, 9b and 10b.** Single crystals suitable for X-ray diffraction study were mounted on a glass fiber for **8b**, **9a** and **9b** or sealed in a glass capillary for **10b** and used for data collection. All measurements were made on a Rigaku Mercury CCD area detector with graphite monochromated Mo-K $\alpha$  radiation. Empirical absorption correction and Lorentz-polarization corrections were applied. The structures were solved by direct methods (SIR92)<sup>5</sup>, expanded using Fourier techniques<sup>6</sup> and refined by full-matrix least-squares method on *F*<sub>2</sub> (SHELXL97)<sup>7</sup>. The non-hydrogen atoms were refined anisotropically. Some hydrogen atoms were refined isotropically and the rest were refined using the riding model. ORTEP diagrams of **8b**, **9a** and **9b** are shown in Figure S1-S3.

## References

- 1 N. Iki, C. Kabuto, T. Fukushima, H. Kumagai, H. Takeya, S. Miyanari, T. Miyashi and S. Miyano, *Tetrahedron*, 2000, **56**, 1437.
- 2 P. Rao, M. W. Hosseini, A. D. Cian and J. Fischer, *Chem. Commun.*, 1999, 2169.
- 3 J. W. Kang and P. M. Maitlis, *J. Am. Chem. Soc.*, 1969, **91**, 5970.
- 4 V. Csokai, A. Grün, G. Parlagh and I. Bitter, *Tetrahedron Lett.*, 2002, **43**, 7627.
- 5 A. Altomare, G. Cascarano, C. Giacovazzo, A. Guagliardi, M. Burla, G. Polidori and M. Camalli, *J. Appl. Crystallogr.*, 1994, **27**, 435.
- 6 P. T. Beurskens, G. Admiraal, G. Beurskens, W. P. Bosman, R. de Gelder, R. Israel and J. M. M. Smits, *The DIRDIF-99 program system, Technical Report of the Crystallography Laboratory*, University of Nijmegen, The Netherlands, 1999.
- 7 Sheldrick, G. M. *SHELXL-97, Program for Crystal Structure Refinement*, University of Göttingen, Germany, 1997.

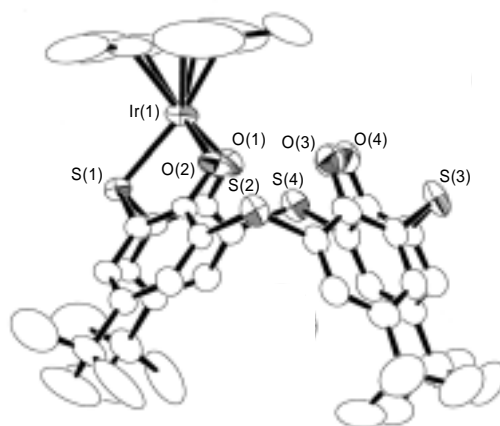

**Fig. S1** ORTEP drawing of **8b** with the hydrogen atoms and the solvents omitted for clarity. Thermal ellipsoids are shown at the 50% probability level. Selected bond lengths (Å): Ir(1)–S(1) = 2.358(2), Ir(1)–O(1) = 2.078(5), Ir(1)–O(2) = 2.088(5).

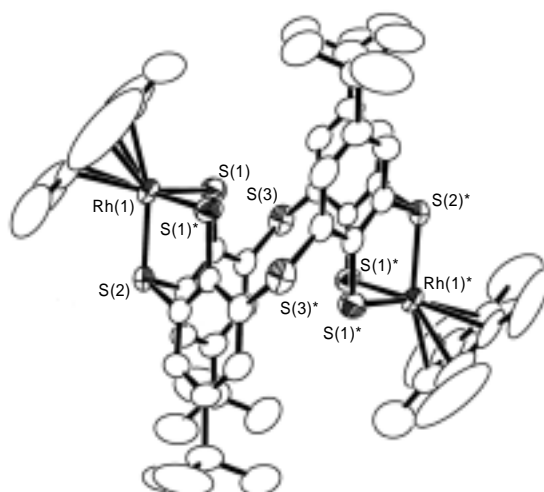

**Fig. S2** ORTEP drawing of **9a** with the hydrogen atoms omitted for clarity. Thermal ellipsoids are shown at the 50% probability level. Selected bond lengths (Å): Rh(1)–S(1) = 2.337(2), Rh(1)–S(2) = 2.284(2).

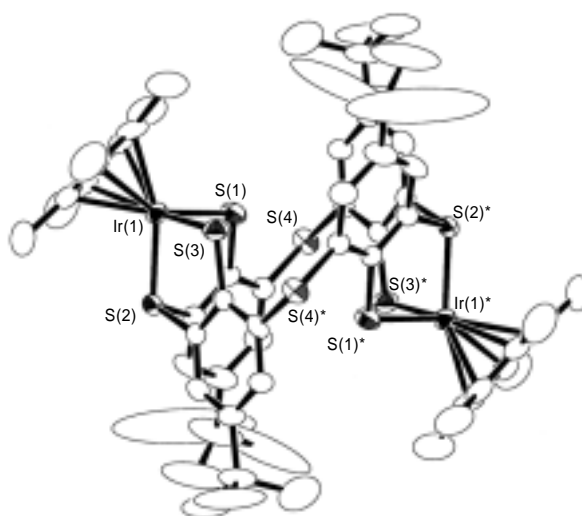

**Fig. S3** ORTEP drawing of **9b** with the hydrogen atoms omitted for clarity. Thermal ellipsoids are shown at the 50% probability level. Selected bond lengths (Å): Ir(1)–S(1) = 2.343(2), Ir(1)–S(2) = 2.291(1), Ir(1)–S(3) = 2.349(2).
